# Supplementary material for: Zebrafish hoxd4a Acts Upstream of meis1.1 to Direct Vasculogenesis, Angiogenesis and Hematopoiesis
Source: PubMed Central journal article supplement (PMC3598951; doi:10.1371/journal.pone.0058857), 2013-03-15
Supplement: pone.0058857.s001.pdf [file pone.0058857.s001.pdf]

Fig S1

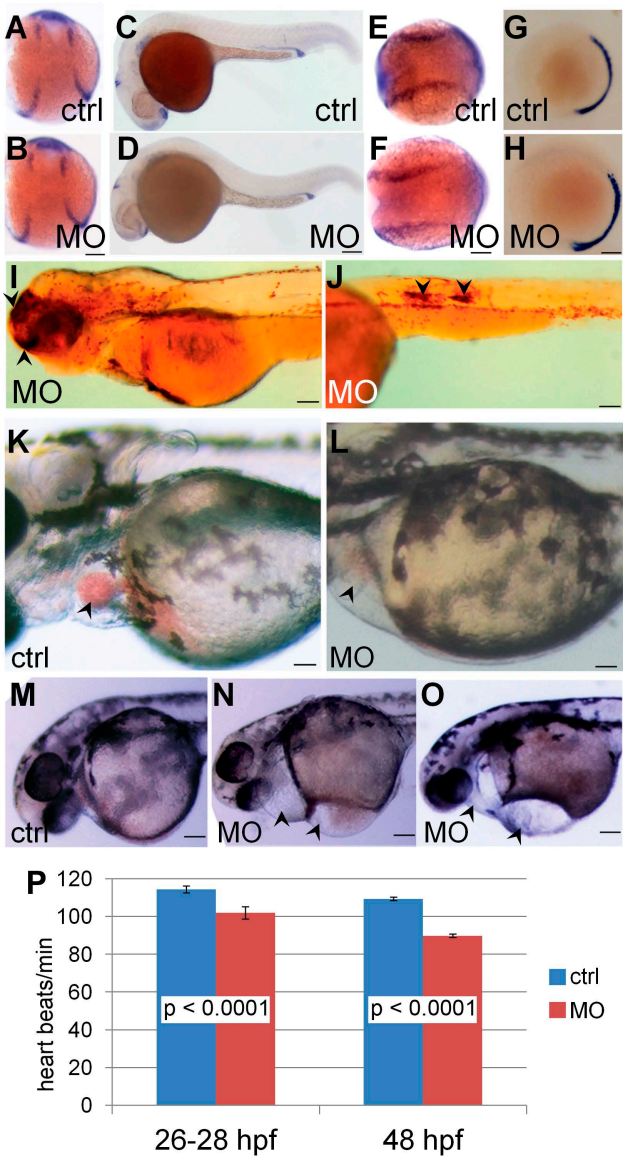

Fig S2

*gata1*

*hbbe1*

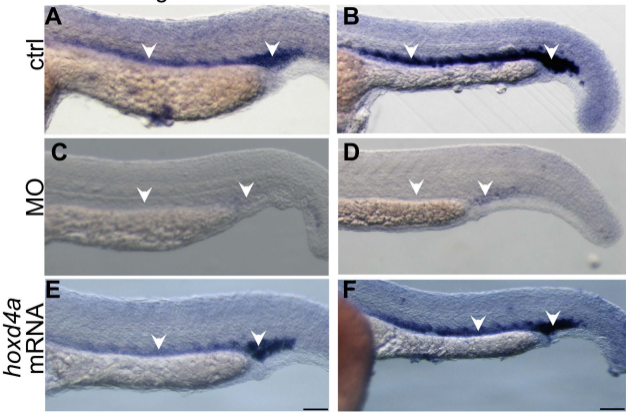

Fig S3

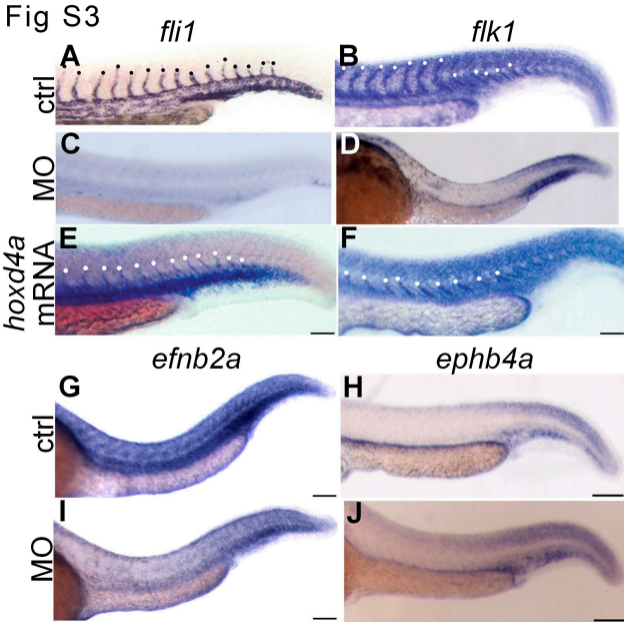

Fig S4

*scl1*

*lmo2*

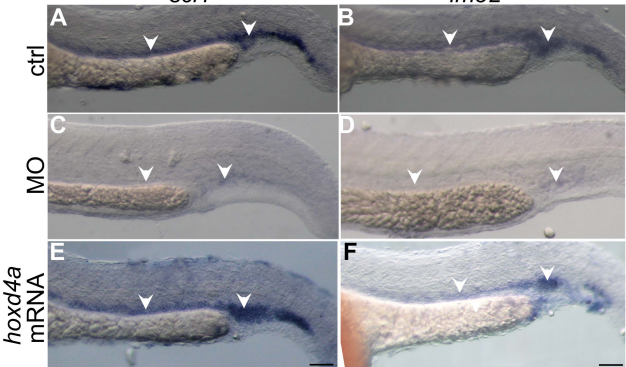

Fig S5

rescuing mRNA

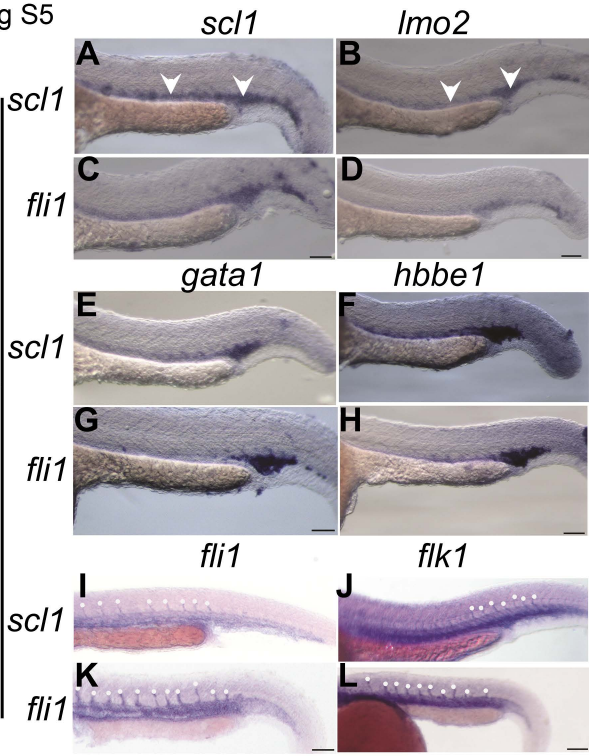

Fig S6

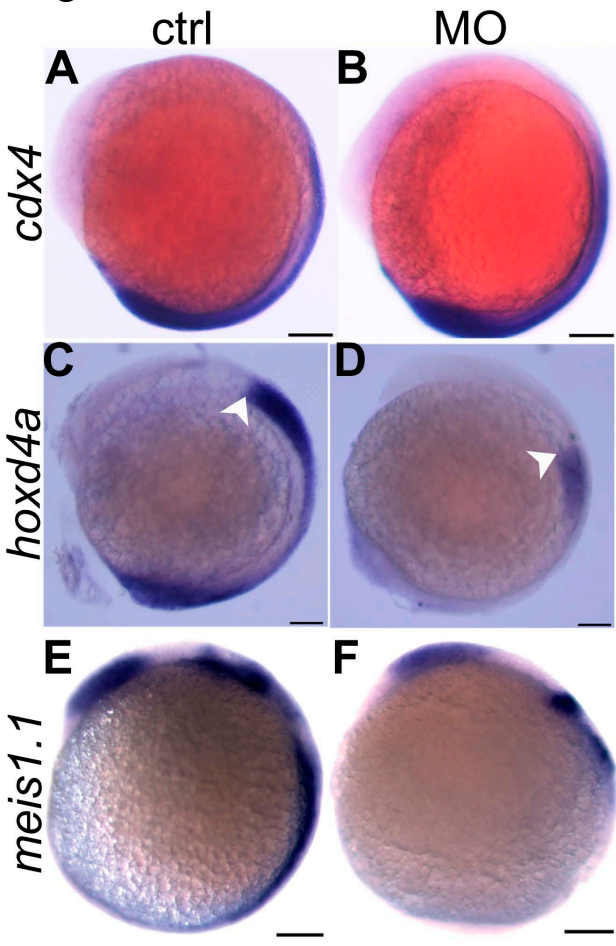

Fig S7

ctrl

MO

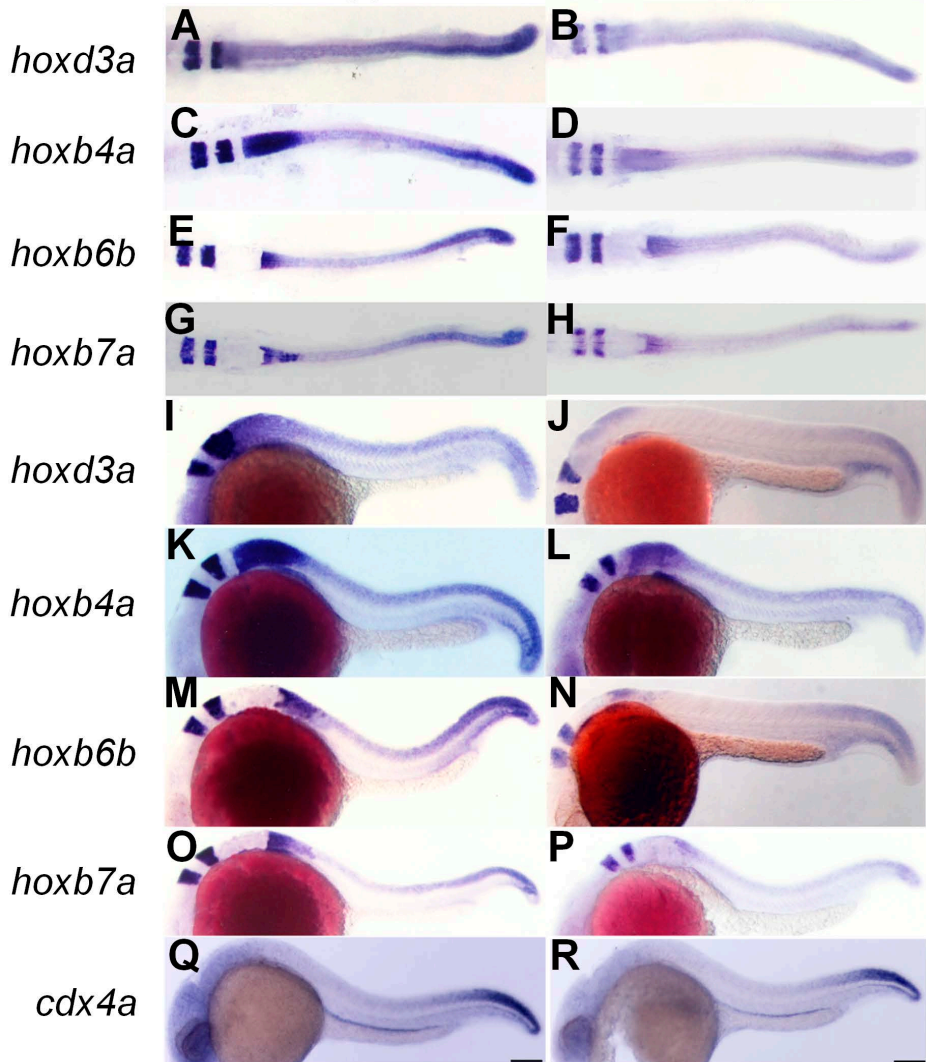

## Supplementary tables S1 and S2

**Table S1.** Primers used for cDNA cloning

| Gene          | Forward 5'→3'                                                    | Reverse 5'→3'                                                                |
|---------------|------------------------------------------------------------------|------------------------------------------------------------------------------|
| <i>hoxd4a</i> | CGCAGAATTCATGGCCATGAGT<br>TCGTACATG                              | TTATAAAGTTGTGATCTCTGTTCTA<br>GAGCGC                                          |
| <i>nkx2.5</i> | CAT GGC ATC AGA GCT TGG<br>TGA ACA AAA CTA CAT TTA<br>CCG ACA GC | GAA TAA TAC GAC TCA CTA TAG<br>GGA GCT CAC TTT CCG CAC AAA<br>GGA AAA AAT AA |



**Table S2.** Primers for quantitative RT-PCR

| Gene           | 5' Forward 3'                 | 5' Reverse 3'              |
|----------------|-------------------------------|----------------------------|
| $\beta$ -actin | TTCCTTCCTGGGTATGGAATC         | GCACTGTGTTGGCATAACAGG      |
| <i>scl</i>     | CTATTAACCGTGGTTTTGCTGG        | CCATCGTTGATTTCAACCTCAT     |
| <i>lmo2</i>    | GGACGCAGGCTTTACTACAAAC        | CCGGATCCTCTTTTCACAGGAA     |
| <i>gata1</i>   | AAGATGGGACAGGCCACTAC          | TGCTGACAATCAGCCTCTTTT      |
| <i>hbbe1</i>   | TGCTCTCTCCAGGATGTTGA          | TCACAGTCTTGCCGTGTTTC       |
| <i>fli1</i>    | CAACGGATCCAGAGAGTCG           | CCATGTAGCCAGTATAGTTCATCTG  |
| <i>flkl</i>    | TTCTGTGCGGCAAGGAGTTTT         | GACCGACCAGACATGAAACC       |
| <i>cmyb</i>    | CCGACAGAAGCCGGATGA            | TGGCACTTCGCCTCAACTG        |
| <i>runx1</i>   | CGGTGAACGGTTAATATGAC          | CTTTTCATCACGGTTTATGC       |
| <i>gata5</i>   | CGCTGATCAGGAAACCATC           | GGGACGGGTGGAAGATAAA        |
| <i>efnb2a</i>  | CCCATTTCACCAAGACTA            | CTTCCCATGAGGAGATGC         |
| <i>vegf</i>    | TGCTCCTGCAAATTCACACAA         | ATCTTGGCTTTTCACATCTGCAA    |
| <i>hoxd4a</i>  | ACCCCTAGCCCTTTCCCTG           | GGTCTTTGTGTTTTGTTGTTGTCC   |
| <i>cdx4</i>    | CCACCACAGAACTTTGTTTCCA        | AATCGGGCGAGCAATAGG         |
| <i>hoxb1a</i>  | ATCCCCCAAAACAGGTA             | CTCAAGTGTGGCAGCAATCT       |
| <i>hoxb3a</i>  | TTCACTGCTTCGCTCTAATGG         | AGGGAGGGGGTGTCTTC          |
| <i>hoxd3a</i>  | TCGCGTCGCTGTTACTCAC           | AGAAATGCCTTCTGCTCCAA       |
| <i>hoxb4a</i>  | CTGCGGTCAGACTCCCATA           | GTTCGGGCTCACGATGTTA        |
| <i>hoxc4a</i>  | TCCACTATAATCGCTACTTAACAC<br>G | GGAGGACGAGGATCTGACTTTG     |
| <i>hoxb5a</i>  | ACATTTTACAGAAATCGACGAGG       | CGCCGAGGTAGTGGAGGTT        |
| <i>hoxc5a</i>  | CGGGAGGCGATAAACACAA           | GAGAGCCCAGAGCTGAACAAG      |
| <i>hoxb6b</i>  | AGGACAGGAGTCTTTCTTGGGTC       | GAGCGGTCAGCGGTTTCG         |
| <i>hoxc6a</i>  | TTATCTGGTGGGCAAGAGGT          | GGTGAATAGAAAGGGGACGC       |
| <i>hoxb7a</i>  | CTTCATCATCTTCTGTCTCCCTG       | TAGCCCCTCTGCTCTTCCTT       |
| <i>hoxb8a</i>  | ACCTACAGCCGCTATCAGACG         | TCAGACTTGCTGCTTGGAAAC      |
| <i>hoxc8a</i>  | AAGACGGTGAAGCGGAGGA           | TACATTTGTATGGAGGGGGATT     |
| <i>hoxa9a</i>  | CCCAACGCACTTCTCCACT           | GTATTCCGTGCCGTCATCAT       |
| <i>hoxc9a</i>  | ACCATCCATACACTACCAACC         | CCCGTAGTGCCTGCTATTCC       |
| <i>hoxa10a</i> | ACGGGGGGAAGTAAACCAC           | TGACCTTTGCTCTCTTGTCGG      |
| <i>hoxd10a</i> | ACGGGGGGAAGTAAACCAC           | TGACCTTTGCTCTCTTGTCGG      |
| <i>meis1.1</i> | GAG GAC ACA CAT CGC ACA GT    | GAG CCA TGC CCT CAT AAT GT |
